# Supplementary material for: Facile fabrication of glycopolymer-based iron oxide nanoparticles and their applications in the carbohydrate–lectin interaction and targeted cell imaging
Source: Royal Society of Chemistry journal article supplement (doi:10.1039/c5py01954k), 2016-01-01
Supplement: c5py01954k1.pdf [file c5py01954k1.pdf]

**Electronic Supplementary Information  
For**

**Facile fabrication of glycopolymer-based iron oxide nanoparticles  
and their applications in carbohydrate-lectin interaction  
and targeted cell imaging**

Chen Shao,<sup>a</sup> Xueming Li,<sup>a</sup> Zhichao Pei,<sup>a</sup> Dongdong Liu,<sup>a</sup> Lin Wang,<sup>a</sup> Hai Dong,<sup>\*b</sup> and Yuxin  
Pei<sup>\*a</sup>

E-mail: peiyx@nwafu.edu.cn

hdong@mail.hust.edu.cn

*<sup>a</sup>College of Science, Northwest A&F University, Yangling, Shaanxi 712100, People's Republic of  
China.*

*<sup>b</sup>School of Chemistry & Chemical Engineering, Huazhong University of Science & Technology,  
Luoyu Road 1037, 430074 Wuhan, PR China.*

## Syntheses of compound 1, PFPA-COOH, compound 3 and 5

The amino-alkyne **1**,<sup>1</sup> PFPA-COOH,<sup>2</sup> 2-azidoacetohydrazide **3**,<sup>3</sup> azide-functionalized Rhodamine B **5**<sup>4</sup> were synthesized according to the published procedures, respectively. Their NMR spectra data are in agreement with those published.

**Amino-alkyne (1)** Pale yellow oil. <sup>1</sup>H NMR (500 MHz, CDCl<sub>3</sub>):  $\delta$  = 4.19 (d,  $J$  = 2.4 Hz, 2 H, HCCCCH<sub>2</sub>O-), 3.66-3.62 (m, 14 H, -OCH<sub>2</sub>CH<sub>2</sub>OCH<sub>2</sub>CH<sub>2</sub>NH<sub>2</sub>), 3.50 (t, 2 H, -OCH<sub>2</sub>CH<sub>2</sub>NH<sub>2</sub>), 2.86 (s, 2 H, -OCH<sub>2</sub>CH<sub>2</sub>NH<sub>2</sub>), 2.42 (m, 1 H, -HCCCCH<sub>2</sub>O-) ppm.

**PFPA-COOH** Colourless solid. <sup>19</sup>F NMR (500 MHz, CDCl<sub>3</sub>):  $\delta$  = -149.8 (m), -136.2 (m).

**2-azidoacetohydrazide (3)** Colourless oil. <sup>1</sup>H NMR (500 MHz, CDCl<sub>3</sub>):  $\delta$  = 7.59 (s, 1 H, -NHNH<sub>2</sub>), 4.06 (brs, 2 H, -CH<sub>2</sub>-N<sub>3</sub>), 3.92 (s, 2 H, -NHNH<sub>2</sub>) ppm.

**Azide-functionalized Rhodamine B (5)** Thick red oil. <sup>1</sup>H NMR (500 MHz, CDCl<sub>3</sub>):  $\delta$  8.34-8.28 (m, 1 H, Ar-H), 7.80 (t,  $J$  = 7.5 Hz, 1 H, Ar-H), 7.72 (t,  $J$  = 7.8 Hz, 1 H, Ar-H), 7.28 (d,  $J$  = 7.5 Hz, 1 H, Ar-H), 7.08 - 7.02 (m, 2 H, Ar-H), 6.89 (dd,  $J$  = 9.5, 2.4 Hz, 2 H, Ar-H), 6.79 (t,  $J$  = 5.7 Hz, 2 H, Ar-H), 4.16 (t,  $J$  = 4.6 Hz, 2 H, -COOCH<sub>2</sub>-), 3.68 - 3.51 (m, 21 H, -OCH<sub>2</sub>CH<sub>2</sub>O-, Ar-CH), 3.36 - 3.32 (m, 2 H, N<sub>3</sub>-CH<sub>2</sub>-), 1.28 (t,  $J$  = 7.1 Hz, 12 H, -CH<sub>3</sub>) ppm.

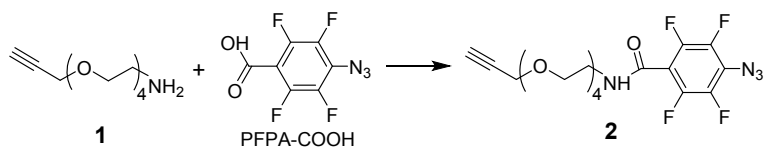

**Scheme S1** Synthesis of alkyne-PFPA **2**. Reagent and condition: EDC, DCM, r.t., overnight.

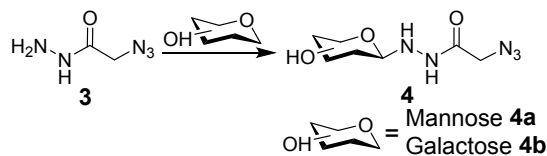

**Scheme S2** Synthesis of azide-modified mannose/galactose (**4a/4b**). Reagent and condition: EtOH : H<sub>2</sub>O = 3 : 1, v/v, 80 °C, 8 h.

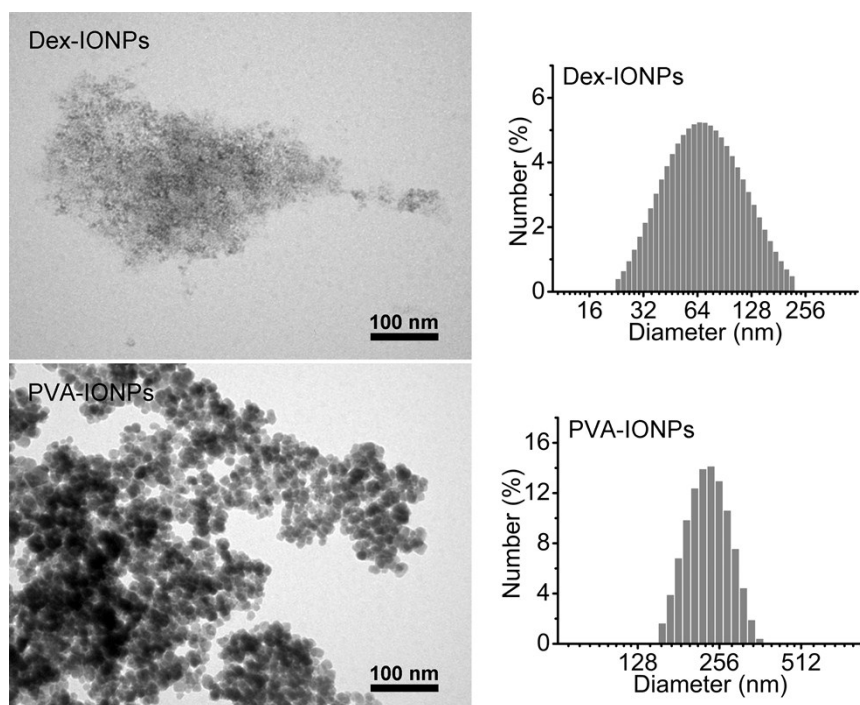

**Fig. S1** TEM images and DLS analysis of Dex-IONPs and PVA-IONPs.

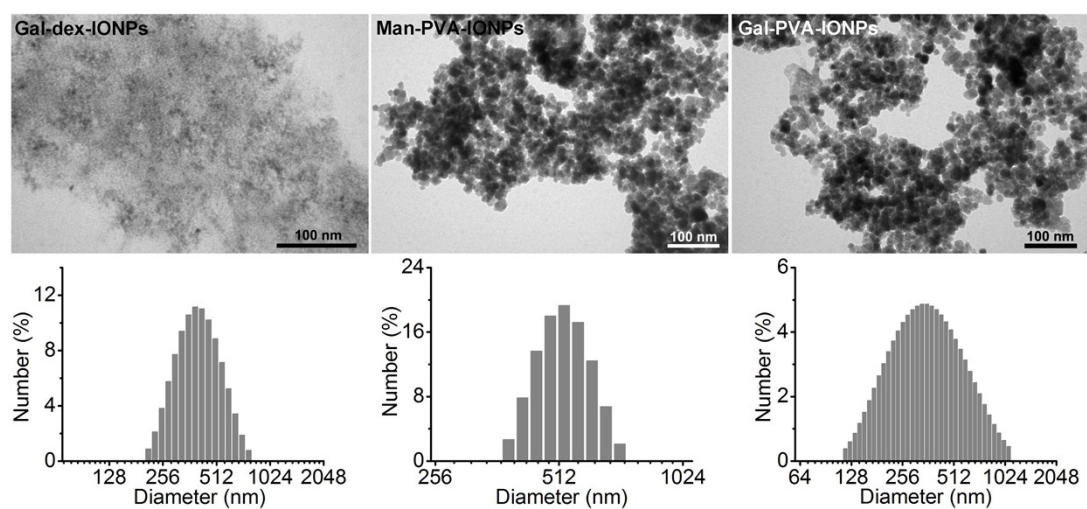

**Fig. S2** TEM images and DLS analysis of three new made GIONs.

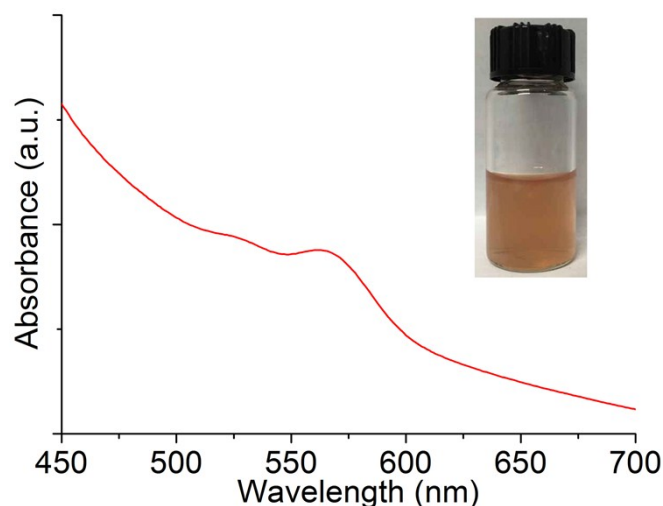

**Fig. S3** The UV-Vis absorption spectra and the pictures (inset) of Gal-RhB-IONPs.

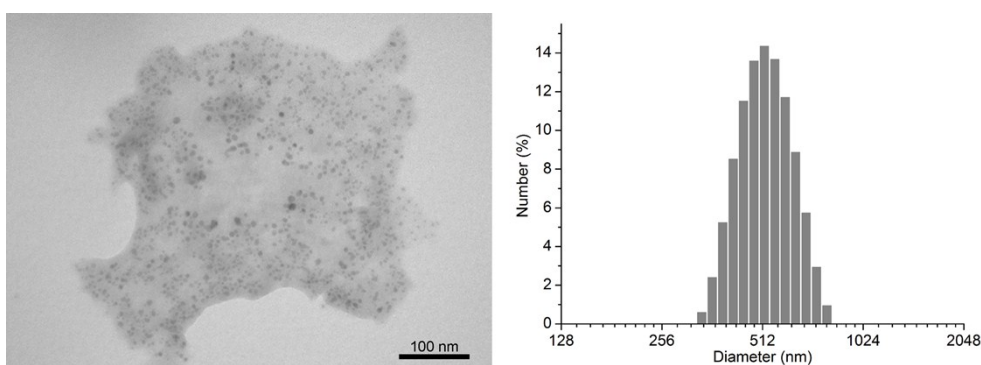

**Fig. S4** TEM images and DLS analysis of Gal-RhB-IONPs.

#### Determination of the amount of alkynyl group on A-IONP surface<sup>4</sup>

The amount of alkynyl group on the surface of A-IONP was determined by HPLC according to the following procedure:

15.0 mg A-IONPs were suspended in 5.0 mL mixture of DMSO and H<sub>2</sub>O (DMSO:H<sub>2</sub>O = 4 : 1, v/v), followed by the addition of benzyl azide (5.0 mg), CuSO<sub>4</sub>·5H<sub>2</sub>O (3.0 mg) and sodium ascorbate (5.0 mg). The mixture was incubated on a shaker at room temperature for 24 h. Thereafter, 1.0 mL reaction suspension was added to 1.0 mL acetone to precipitate NPs, then NPs were removed with a magnet, and the solvent was filtered with 0.22 μm filter. Then the concentration of benzyl azide in the filtrate was analyzed by HPLC (Shimadzu LC 20AT, 150 × 4.6 mm C18 analytical column with particle size of 5 μm). A control experiment was performed without the catalyst. The analysis was carried out at 25 °C using a mobile phase A (H<sub>2</sub>O:MeCN 90:10, v/v, + 0.1 % TFA) and B (MeCN + 0.1 % TFA) at a flow rate of 1.0 mL/min. The following gradient was applied: A linear increase from solution 30 % to 100 % B in 8 min, then held for 2 min. The detection wavelength was 295 nm. The amount of alkyne group was calculated according to the following equation:

$$N = \frac{2 \times (C_0 - C) \times V}{m}$$

Where  $C$  stands for the concentration of benzyl azide in the supernatant after the reaction ( $\mu\text{mol/mL}$ );  $C_0$  stands for the concentration of benzyl azide in control experiment ( $\mu\text{mol/mL}$ );  $m$  stands for the mass of A-IONPs (mg);  $V$  stands for the volume of the reaction solvent (mL);  $N$  stands for the amount of alkynyl group ( $\mu\text{mol/mg}$  NPs). For each sample, the amount of alkyne group was averaged from three independent measurements.

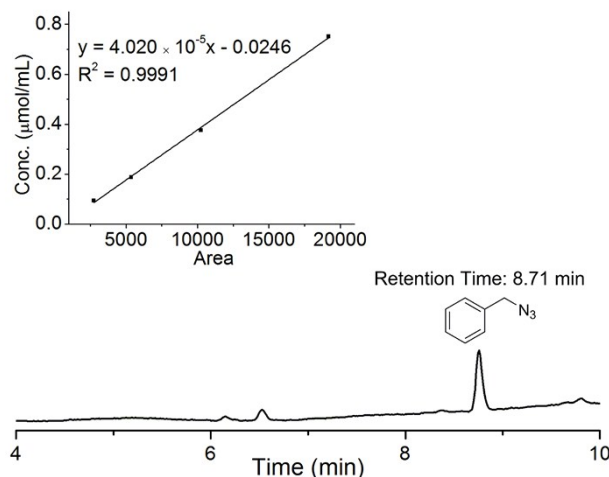

**Fig. S5** HPLC chromatogram for the supernatant from the reaction mixture of A-IONPs and benzyl azide; Inset: the standard curve of benzyl azide.

**Determination of galactose amount on Gal-RhB-IONP surface:** Gal-RhB-IONPs (1.75 mg) were dispersed in deionized water (2.0 mL) in an ice bath. A freshly prepared 0.1% (w/w) solution of anthrone in sulfuric acid (8.0 mL) was added slowly to this solution. The resulting solution was gently mixed and heated to 100 °C for 10 min, then cooled in ice-water bath. The absorption of the solution was measured at 620 nm and compared with those that were obtained from a standard curve to determine the amount of galactose on the Gal-RhB-IONP surface. The reported amount of galactose was averaged from three independent measurements.

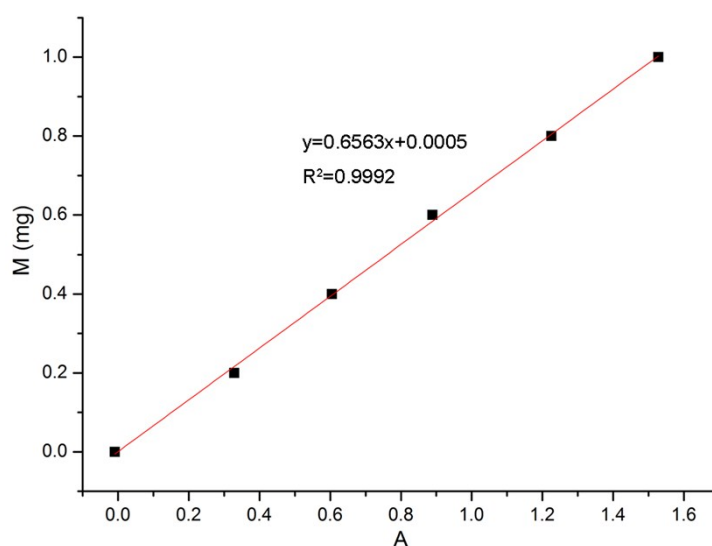

**Fig. S6** The standard curve of galactose in determination of carbohydrate amount on Gal-RhB-IONP surface by anthrone–sulfuric acid colorimetric assay.

**Determination of Rhodamine B amount on Gal-RhB-IONP surface:** Gal-RhB-IONPs (0.5 mg) were dispersed in deionized water (20 mL). The absorption of the solution was measured at 571 nm (0.025 mg/mL PVA-IONPs in deionized water were used as control) and compared with those that were obtained from a standard curve to determine the amount of Rhodamine B on the Gal-RhB-IONP surface. The reported amount of Rhodamine B was averaged from three independent measurements.

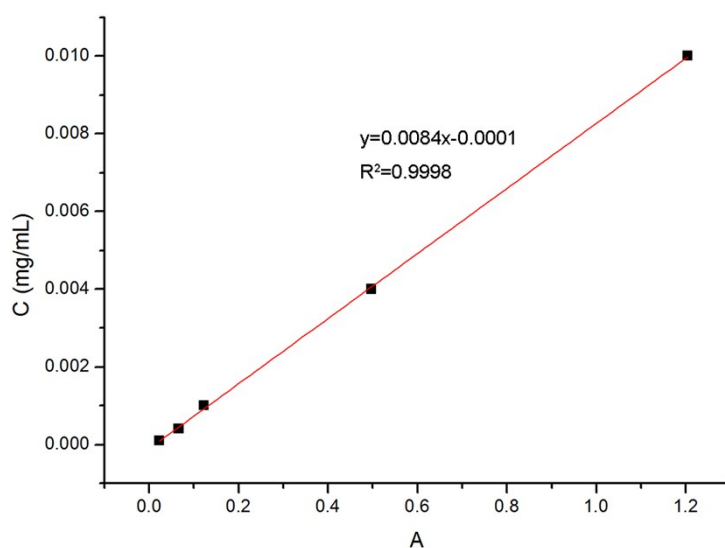

**Fig. S7** The standard curve of compound **5** in determination of Rhodamine B amount on Gal-RhB-IONP surface by UV-visible absorbance.

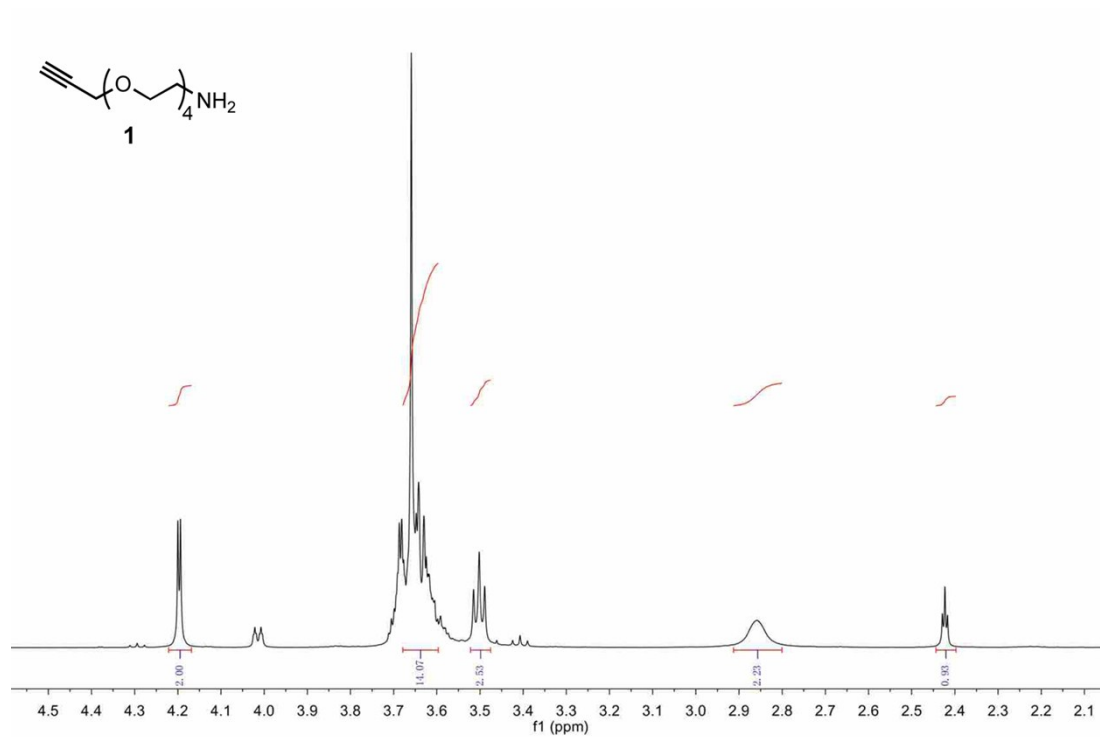

**Fig. S8** <sup>1</sup>H NMR spectrum of amino-alkyne **1**.

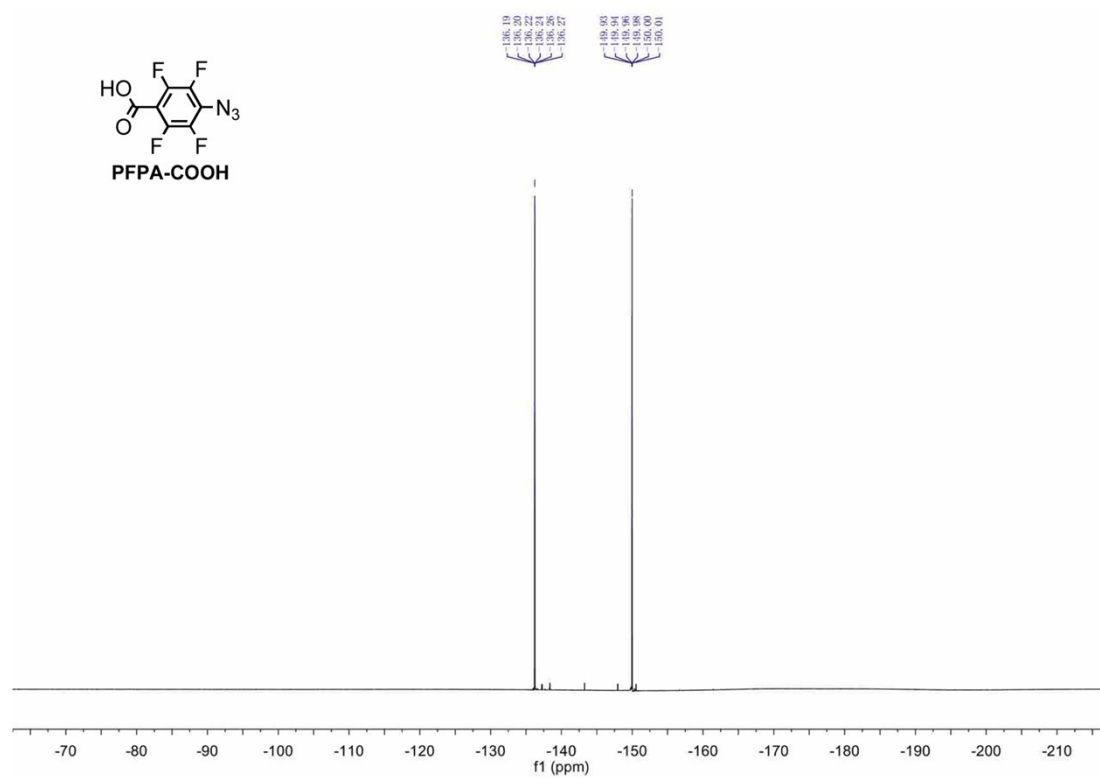

**Fig. S9** <sup>19</sup>F NMR spectrum of PFPA-COOH.

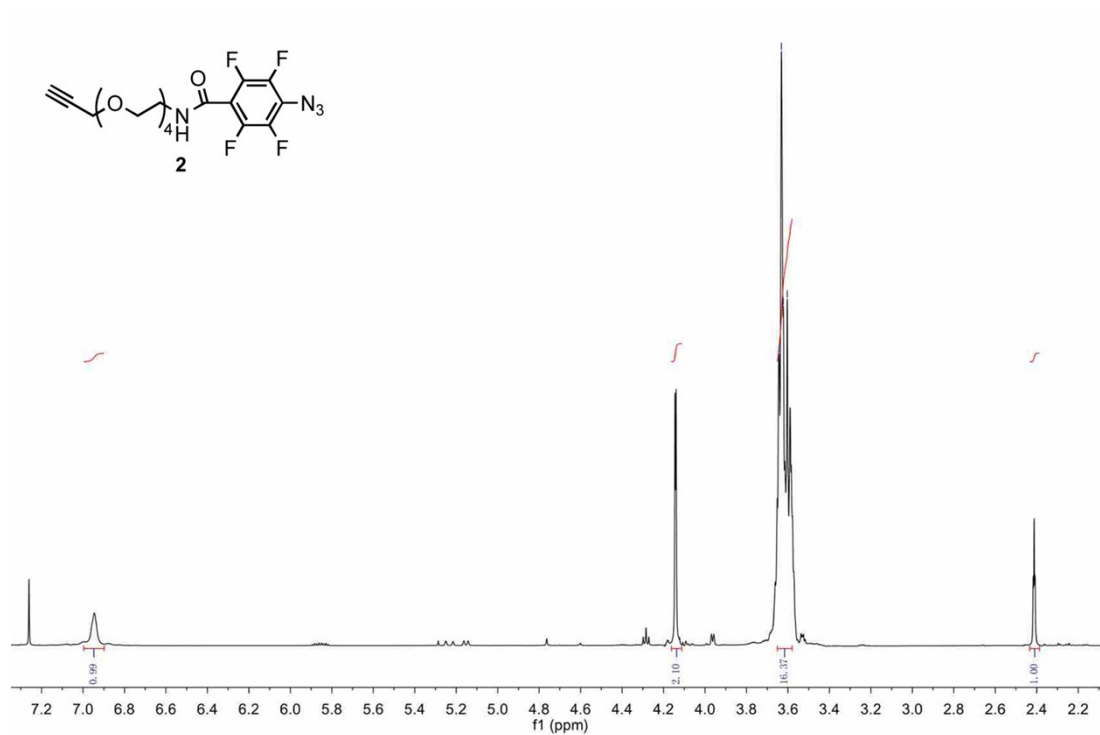

**Fig. S10** <sup>1</sup>H NMR spectrum of alkyne-PFPA **2**.

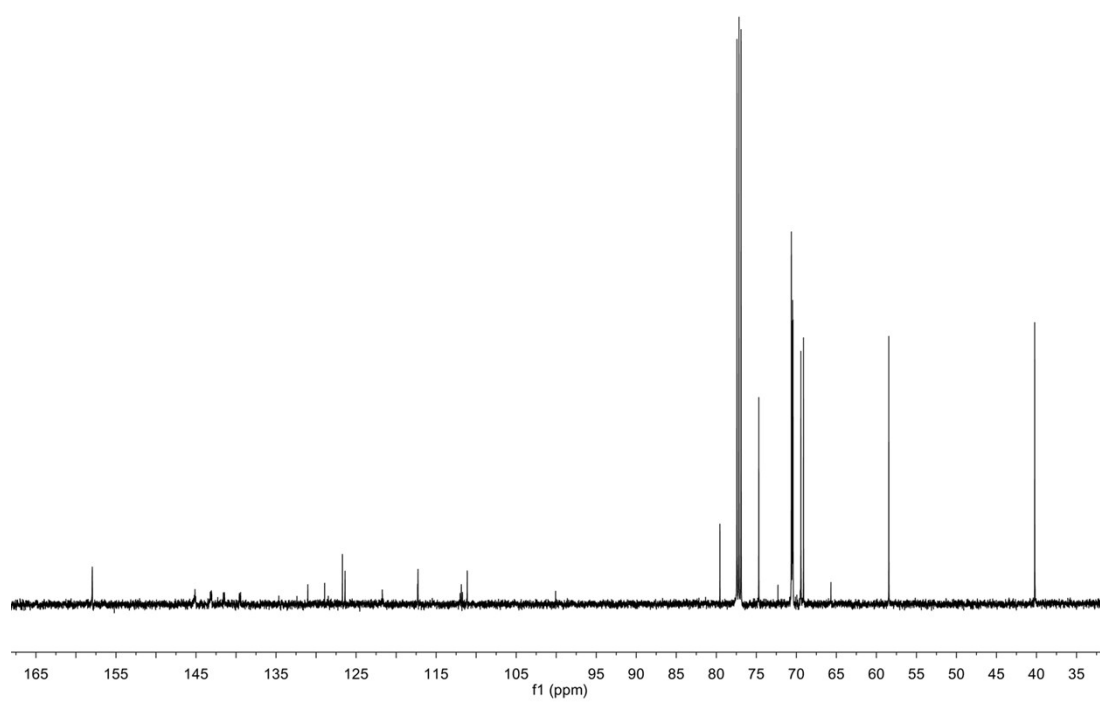

**Fig. S11** <sup>13</sup>C NMR spectrum of alkyne-PFPA **2**.



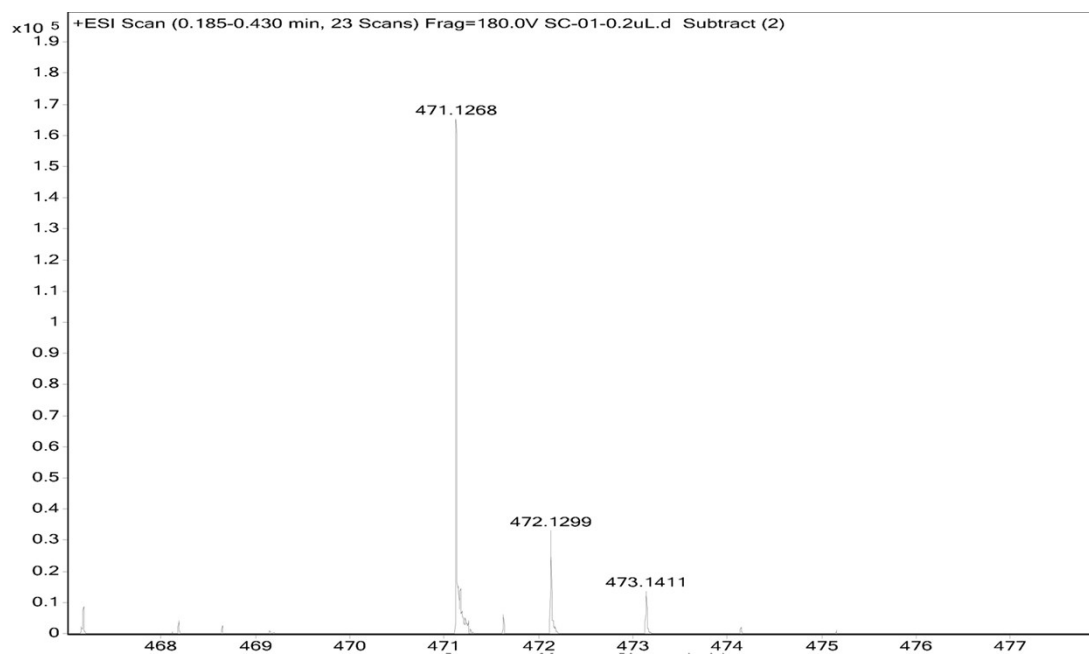

**Fig. S12** ESI HRMS spectrum of alkyne-PFPA **2**.

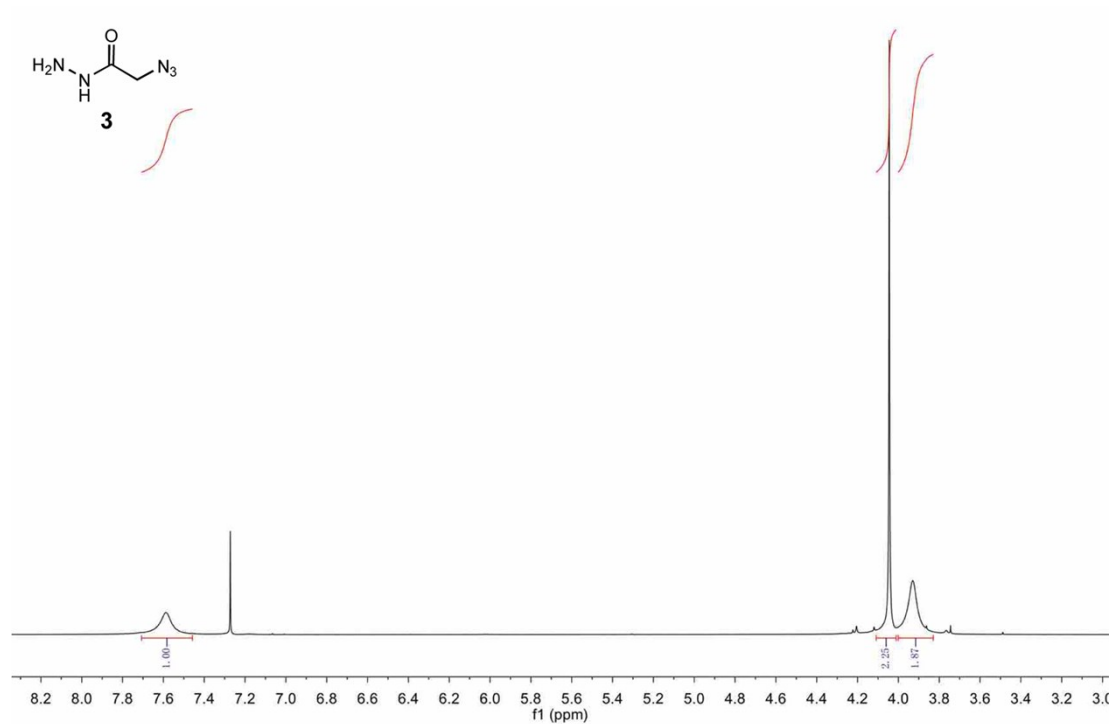

**Fig. S13** <sup>1</sup>H NMR spectrum of 2-azidoacetohydrazide **3**.

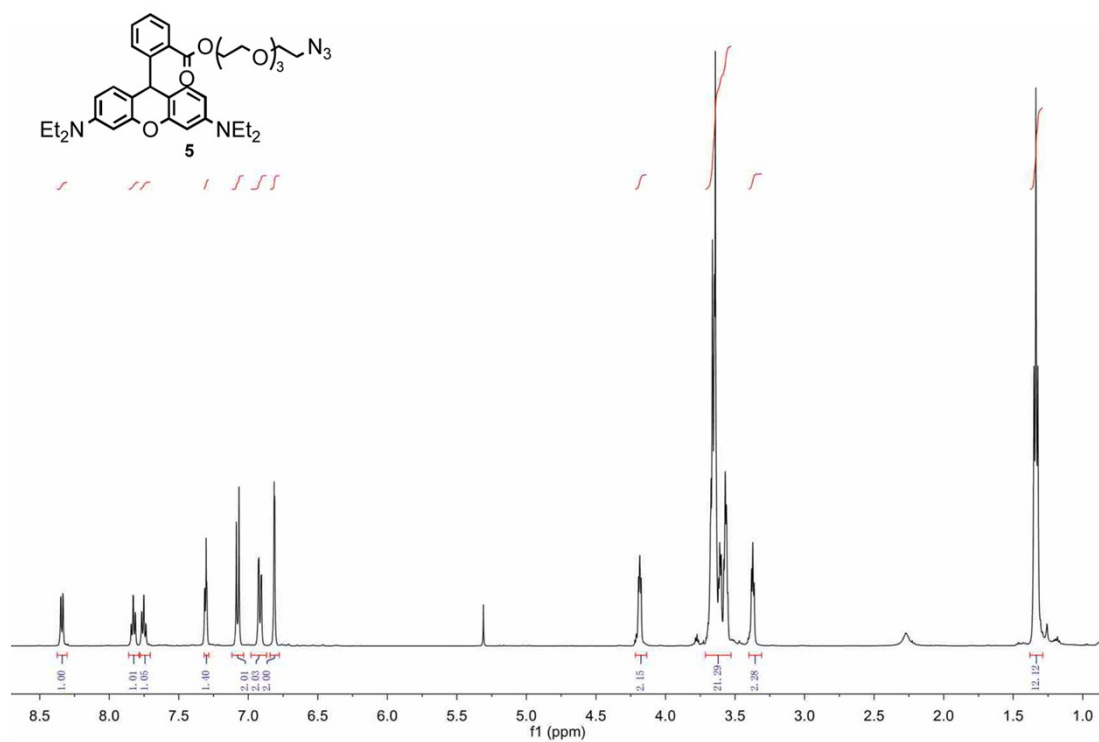

**Fig. S14** <sup>1</sup>H NMR spectrum of azide functionalized Rhodamine B **5**.

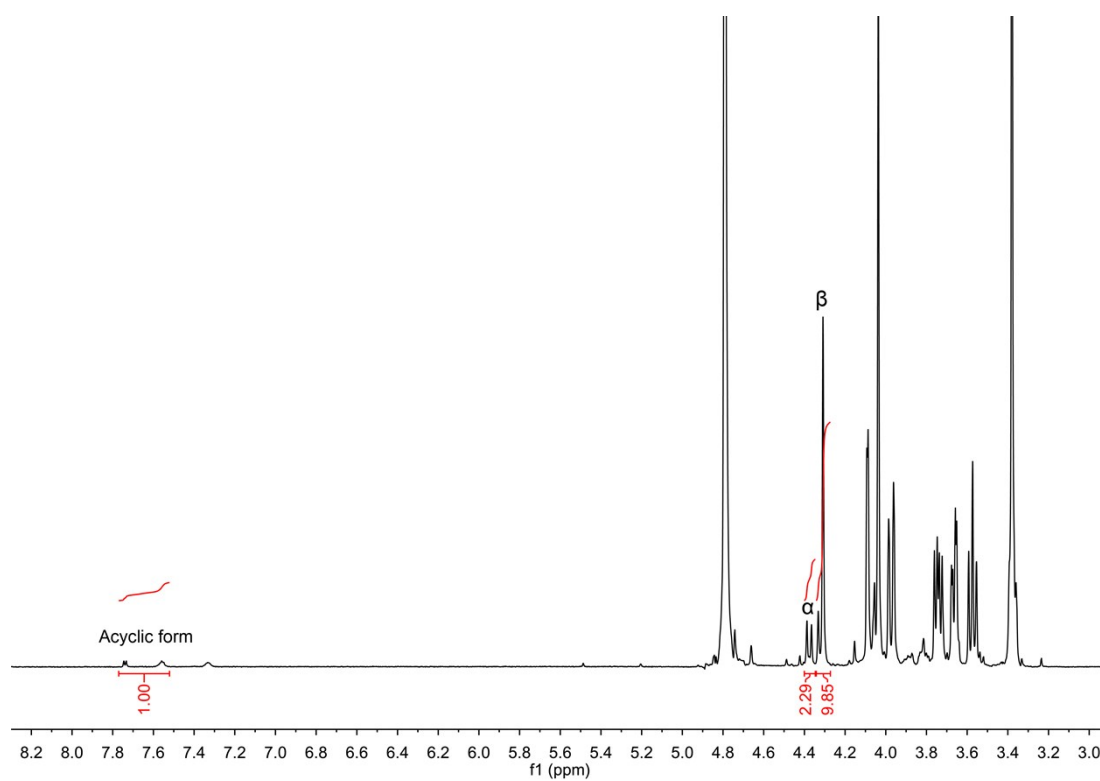

**Fig. S15** <sup>1</sup>H NMR spectrum of azide modified mannose **4a**.

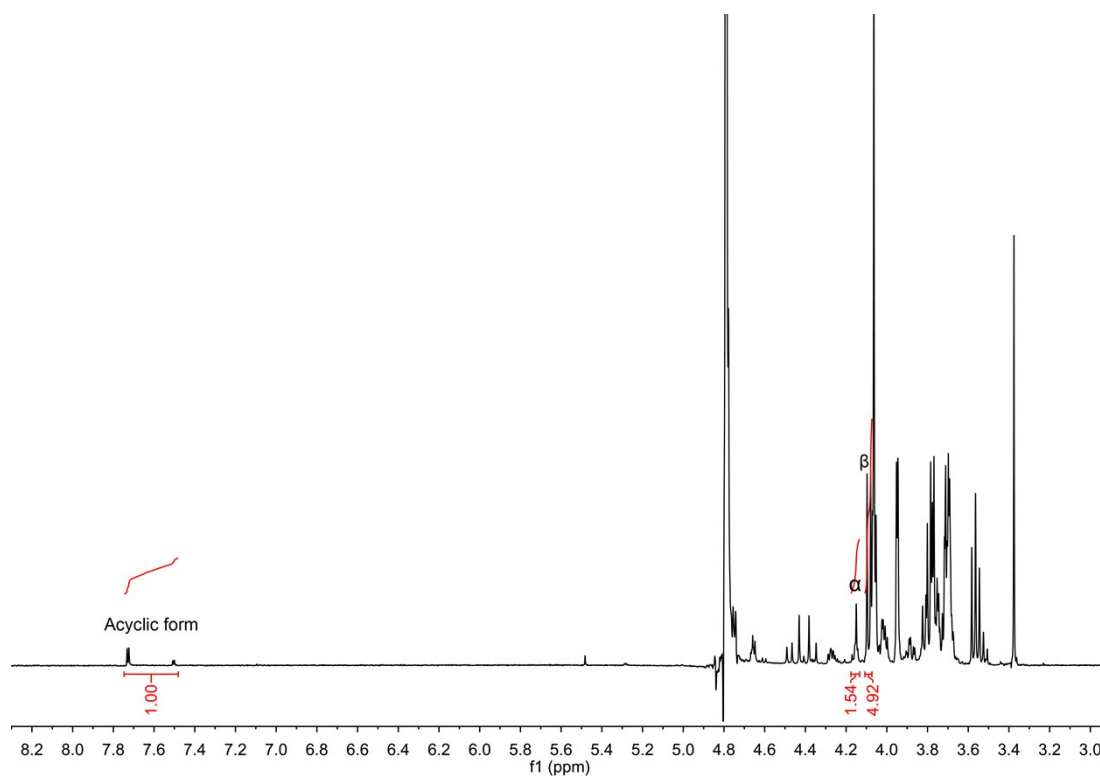

**Fig. S16**  $^1\text{H}$  NMR spectrum of azide modified galactose **4b**.

## Reference

- 1 L. N. Goswami, Z. H. Houston, S. J. Sarma, S. S. Jalisatgi and M. F. Hawthorne, *Org. Biomol. Chem.*, 2013, **11**, 1116-1126.
- 2 J. F. W. Keana and S. X. Cai, *J. Org. Chem.*, 1990, **55**, 3640-3647.
- 3 I. Singh, C. Freeman and F. Heaney, *Eur. J. Org. Chem.*, 2011, **2011**, 6739-6746.
- 4 Y. Hou, S. Cao, X. Li, B. Wang, Y. Pei, L. Wang and Z. Pei, *ACS Appl. Mater. Interfaces*, 2014, **6**, 16909-16917.
